# Supplementary material for: Licorice extract attenuates brain aging of d-galactose induced rats through inhibition of oxidative stress and attenuation of neuronal apoptosis
Source: Royal Society of Chemistry journal article supplement (doi:10.1039/c7ra07110h), 2017-01-01
Supplement: c7ra07110h1.pdf [file c7ra07110h1.pdf]

## Supplementary materials

### 1. LC-MS method

The LC method employed a Waters ACQUITY UPLC HSS T3 (2.1 mm×100 mm, 1.8 μm) equipped with an online filter and maintained at 40°C. Peaks were separated using a mobile phase of 0.1% formic acid water and acetonitrile with a gradient program at a flow rate of 0.2 mL/min. The optimum ion source parameters were as follows: ESI source temperature, 300 °C; spray voltage, 3525.4 V; sheath gas pressure, 35 psi; auxiliary gas pressure, 10 psi. Mass spectra of carotenoids were acquired with an m/z 100-1500 scan range. Mass spectra of carotenoids were acquired with an m/z 100-1500 scan range.

#### The gradient program as follows:

| Times/S | 0.1% formic acid (%) | Acetonitrile (%) |
|---------|----------------------|------------------|
| 0       | 5.0                  | 95.0             |
| 2       | 10.0                 | 90.0             |
| 5       | 17.0                 | 83.0             |
| 8       | 18.0                 | 82.0             |
| 10      | 23.0                 | 77.0             |
| 14      | 30.0                 | 70.0             |
| 17      | 38.0                 | 62.0             |
| 20      | 90.0                 | 10.0             |
| 22      | 90.0                 | 10.0             |
| 23      | 5.0                  | 95.0             |

**Table S1** chemical constituents identified in extracts form licorice

| No. | Time (min) | Negative ions (m/z) |                                                                                      | Positive ions (m/z) |                                                                                       | Identification                                        |
|-----|------------|---------------------|--------------------------------------------------------------------------------------|---------------------|---------------------------------------------------------------------------------------|-------------------------------------------------------|
|     |            | [M-H] <sup>-</sup>  | MS <sup>2</sup>                                                                      | [M+H] <sup>+</sup>  | MS <sup>2</sup>                                                                       |                                                       |
| 1   | 7.48       | 579.1735            | 417.1204[M-H-glc] <sup>-</sup> ,<br>255.0669[M-H-2glc] <sup>-</sup>                  | -                   | -                                                                                     | Glucoliquiritin<br>(Liquiritigenin -7,4'-diglucoside) |
| 2   | 7.74       | 425.2528            | 221.1544                                                                             | 423.2216            | -                                                                                     | Kanzonol H                                            |
| 3   | 9.16       | 563.1423            | -                                                                                    | 565.1586            | 403.0819[M+H-glc] <sup>+</sup> ,<br>271.9175[M+H-api-glc] <sup>+</sup>                | Schaftoside                                           |
| 4   | 10.49      | 577.1581            | 485.1078[M-H-C <sub>6</sub> H <sub>4</sub> O] <sup>-</sup> ,<br>473.8525, 383.8653   | 579.1732            | -                                                                                     | Isoviolanthin                                         |
| 5   | 10.75      | 549.1631            | 417.1216[M-H-api] <sup>-</sup> ,<br>255.0669[M-H-api-glc] <sup>-</sup> ,<br>135.0084 | 551.1767            | 419.1351[M+H-api] <sup>+</sup> ,<br>257.0818[M+H-api-glc] <sup>+</sup>                | Liquiritin apioside                                   |
| 6   | 10.91      | 417.1203            | 255.0669[M-H-glc] <sup>-</sup> ,<br>135.0084, 119.0497                               | 419.1365            | 257.0820[M+H-glc] <sup>+</sup> ,<br>239.0711, 211.0764, 163.0398                      | Liquiritin                                            |
| 7   | 12.92      | 593.0906            | -                                                                                    | 595.6331            | -                                                                                     | Vicenin-2                                             |
| 8   | 13.84      | 549.1631            | 255.0669[M-H-api-glc] <sup>-</sup> ,<br>135.0084                                     | 551.1767            | 419.1348[M+H-api] <sup>+</sup> ,<br>257.0820[M+H-api-glc] <sup>+</sup> ,<br>239.0712, | Isoliquiritin apioside                                |
| 9   | 14.36      | 417.1202            | 255.0668[M-H-glc] <sup>-</sup> ,<br>135.0084                                         | 419.136             | 257.0818[M+H-glc] <sup>+</sup> ,<br>137.0239                                          | Isoliquiritin                                         |
| 10  | 15.61      | 255.0669            | -                                                                                    | 257.0819            | 137.024[M+H-120] <sup>+</sup> ,                                                       | Liquiritigenin                                        |
| 11  | 15.69      | 475.9218            | -                                                                                    | 431.1352            | 269.0820[M+H-glc] <sup>+</sup>                                                        | Ononin                                                |

|    |       |          |                                                                                                                                                                                                                       |                      |                                                                                                                                                                                                                     |  |                                                             |
|----|-------|----------|-----------------------------------------------------------------------------------------------------------------------------------------------------------------------------------------------------------------------|----------------------|---------------------------------------------------------------------------------------------------------------------------------------------------------------------------------------------------------------------|--|-------------------------------------------------------------|
|    |       |          | [M+HCOO] <sup>-</sup>                                                                                                                                                                                                 |                      |                                                                                                                                                                                                                     |  |                                                             |
| 12 | 17.34 | 725.2108 | 549.1630[M-H-C <sub>10</sub> H <sub>3</sub> O <sub>8</sub> ] <sup>-</sup> ,<br>399.1095[M-H-api-H <sub>2</sub> O] <sup>-</sup> ,<br>255.0668[M-H-C <sub>10</sub> H <sub>3</sub> O <sub>8</sub> -api-glc] <sup>-</sup> | 727.2234             | -                                                                                                                                                                                                                   |  | Licorice glycoside A                                        |
| 13 | 18.08 | 821.3987 | 351.0578[2×C <sub>6</sub> H <sub>8</sub> O <sub>6</sub> -H] <sup>-</sup> ,                                                                                                                                            | 845.3964<br>823.4145 | 845.3964[M+Na] <sup>+</sup> ,<br>647.3818[M+H-glucuronide acid] <sup>+</sup> ,<br>471.3488[M+H-glucuronide acid ×2] <sup>+</sup> ,<br>453.3383                                                                      |  | Uralsaponin B                                               |
| 14 | 19.23 | 879.4048 | 351.0580[2×C <sub>6</sub> H <sub>8</sub> O <sub>6</sub> -H] <sup>-</sup> ,                                                                                                                                            | 881.4197             | 705.3868[2×C <sub>6</sub> H <sub>8</sub> O <sub>6</sub> -H] <sup>+</sup> ,<br>511.3441[M+H-C <sub>6</sub> H <sub>8</sub> O <sub>6</sub> -C <sub>6</sub> H <sub>10</sub> O <sub>7</sub> ] <sup>+</sup> ,<br>487.3439 |  | 22β-Acetoxyglycyrrhizic acid                                |
| 15 | 19.47 | 837.3937 | -                                                                                                                                                                                                                     | 839.4088             | 469.3335[M+H-C <sub>6</sub> H <sub>8</sub> O <sub>6</sub> -C <sub>6</sub> H <sub>10</sub> O <sub>7</sub> ] <sup>+</sup> ,<br>663.3768[M+H-glucuronide acid] <sup>+</sup> ,                                          |  | Yunganoside K <sub>2</sub>                                  |
| 16 | 20.21 | 837.3937 | -                                                                                                                                                                                                                     | 839.4088             | 487.3438[M+H-glucuronide acid ×2] <sup>+</sup> ,<br>469.3334[487-H <sub>2</sub> O] <sup>+</sup> ,                                                                                                                   |  | Licorice saponin G <sub>2</sub><br>(24-hydroxyglycyrrhizin) |
| 17 | 20.22 | 839.409  | -                                                                                                                                                                                                                     | 841.4251             | 471.3494, 141.0189                                                                                                                                                                                                  |  | Yunganoside G <sub>2</sub>                                  |
| 18 | 20.37 | 837.3937 | -                                                                                                                                                                                                                     | 839.4088             | 663.3768[M+H-glucuronide acid] <sup>+</sup> ,<br>487.3438[M+H-glucuronide acid ×2] <sup>+</sup> ,<br>469.3334[487-H <sub>2</sub> O] <sup>+</sup> ,                                                                  |  | Isomer of Licorice saponin G <sub>2</sub>                   |
| 19 | 20.54 | 821.3992 | 759.4034[M-H-CO <sub>2</sub> -H <sub>2</sub> O] <sup>-</sup> ,<br>351.0581[2×C <sub>6</sub> H <sub>8</sub> O <sub>6</sub> -H] <sup>-</sup> ,                                                                          | 823.4136             | 647.3814[M+H-glc] <sup>+</sup> ,<br>453.3380[M+H-C <sub>6</sub> H <sub>8</sub> O <sub>6</sub> -C <sub>6</sub> H <sub>10</sub> O <sub>7</sub> ] <sup>+</sup> ,                                                       |  | Glycyrrhizin isomer                                         |
| 20 | 21.03 | 823.4055 | -                                                                                                                                                                                                                     | 825.4302             | 649.3898[M+H-glucuronide acid] <sup>+</sup> ,<br>473.3680[M+H-glucuronide acid ×2] <sup>+</sup> ,                                                                                                                   |  | Licorice saponin J <sub>2</sub>                             |

|    |       |          |                                                                                                  |          |                                               |   |              |
|----|-------|----------|--------------------------------------------------------------------------------------------------|----------|-----------------------------------------------|---|--------------|
| 21 | 21.36 | 367.1197 | 309.0416[M-H-C <sub>4</sub> H <sub>10</sub> ];<br>297.0408[M-H-C <sub>5</sub> H <sub>10</sub> ]; | 369.1348 | 455.3537[487-H <sub>2</sub> O] <sup>+</sup> , | - | Glycycomarin |
|----|-------|----------|--------------------------------------------------------------------------------------------------|----------|-----------------------------------------------|---|--------------|

---

**Note:** The compound identification was performed by the literature <sup>1,2</sup> data and chemical databases.

**Reference**

1. M. He, H. Y. Lv, Y. P. Li, C. M. Gonçalves, N. P. Dong, L. S. Pan, P. L. Liu, Y. Z. Liang, *Analytical Methods*, 2014, **6**, 2239-2246.
2. Y. M. Zhao, S. X. Liu, C. X. Zhang, D. L. Liu, T. J. Zhang, *Chinese Traditional & Herbal Drugs*, 2016, **47**, 2061-2068.

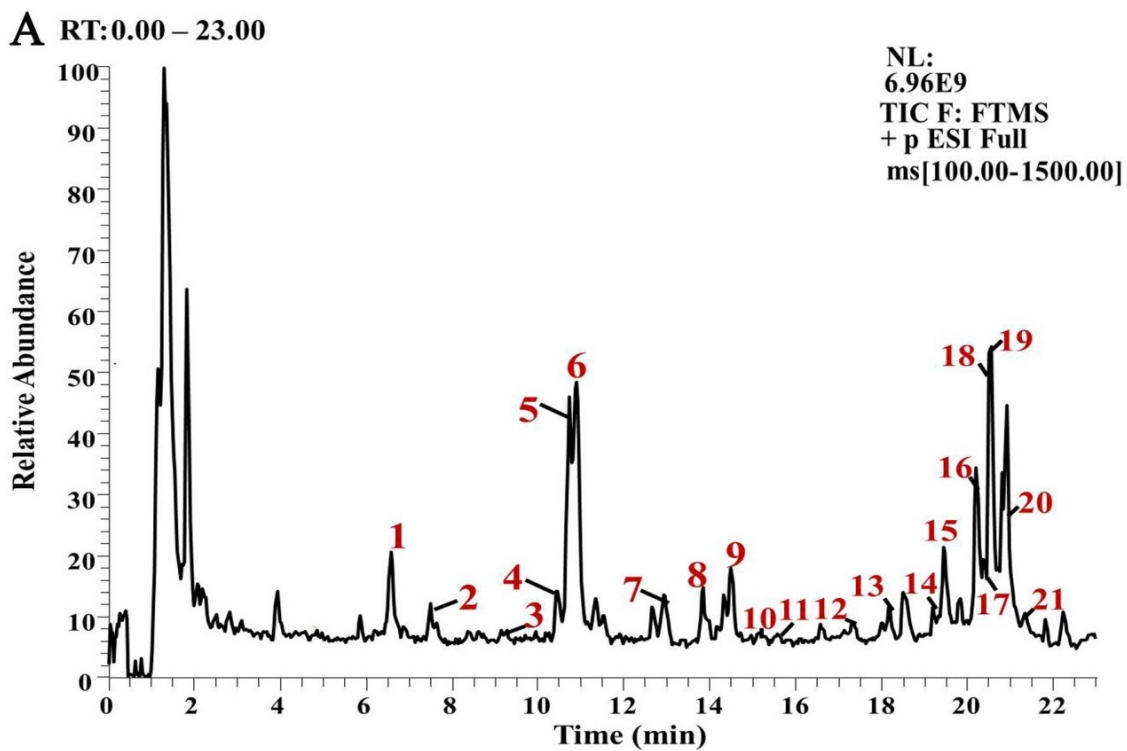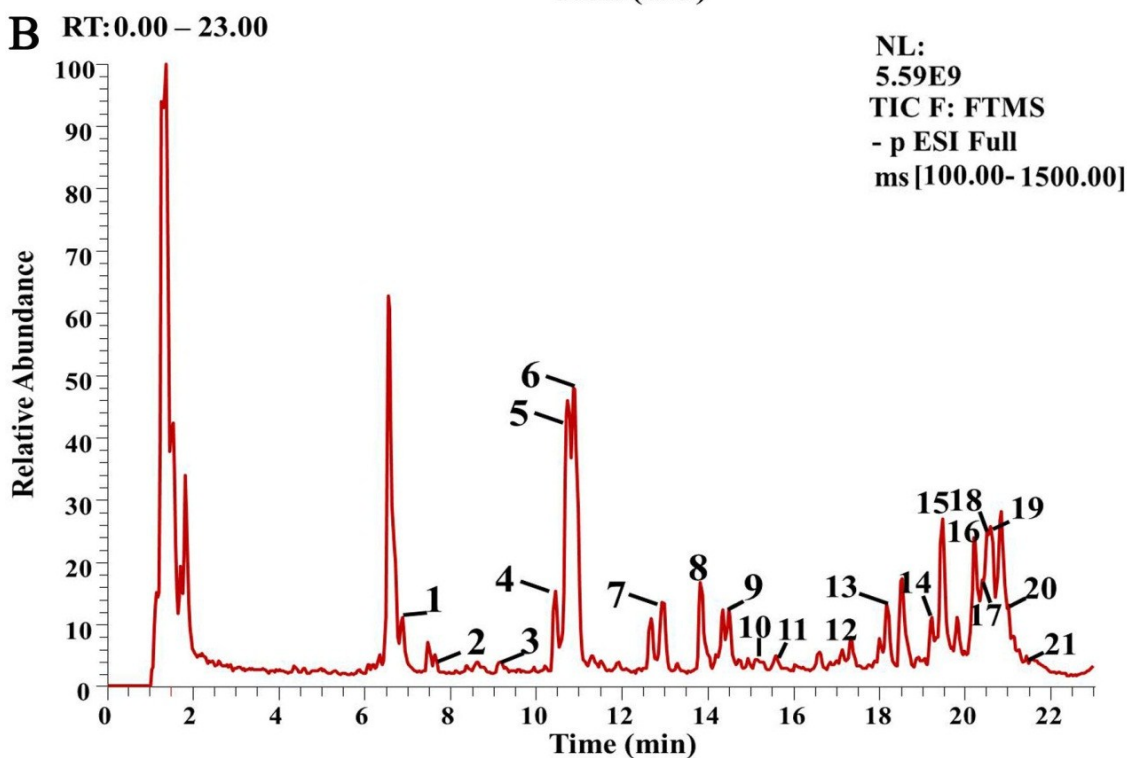

**Fig.S1** Total ion chromatograms of HPLC-Q-TOF-MS by positive mode (A) and negative mode (B) for extraction of licorice.
